# Supplementary material
Source: PubMed Central journal article supplement (PMC7004864)
Supplement: NIHMS1545904-supplement-2.pdf [file NIHMS1545904-supplement-2.pdf]

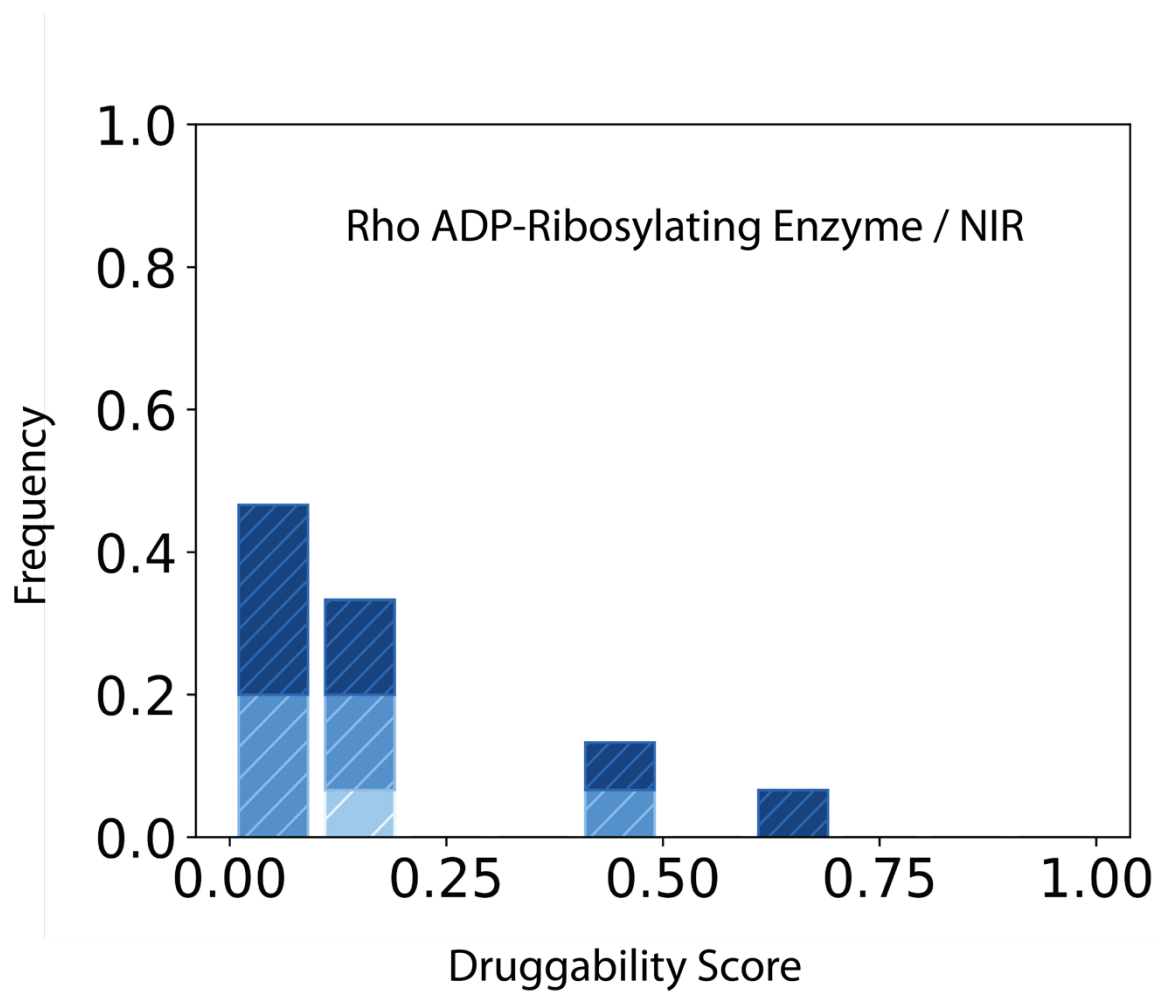

Figure S1. Druggability scores of unliganded Rho ADP-Ribosylating Enzyme structures, related to Table 1 and Figure 3.

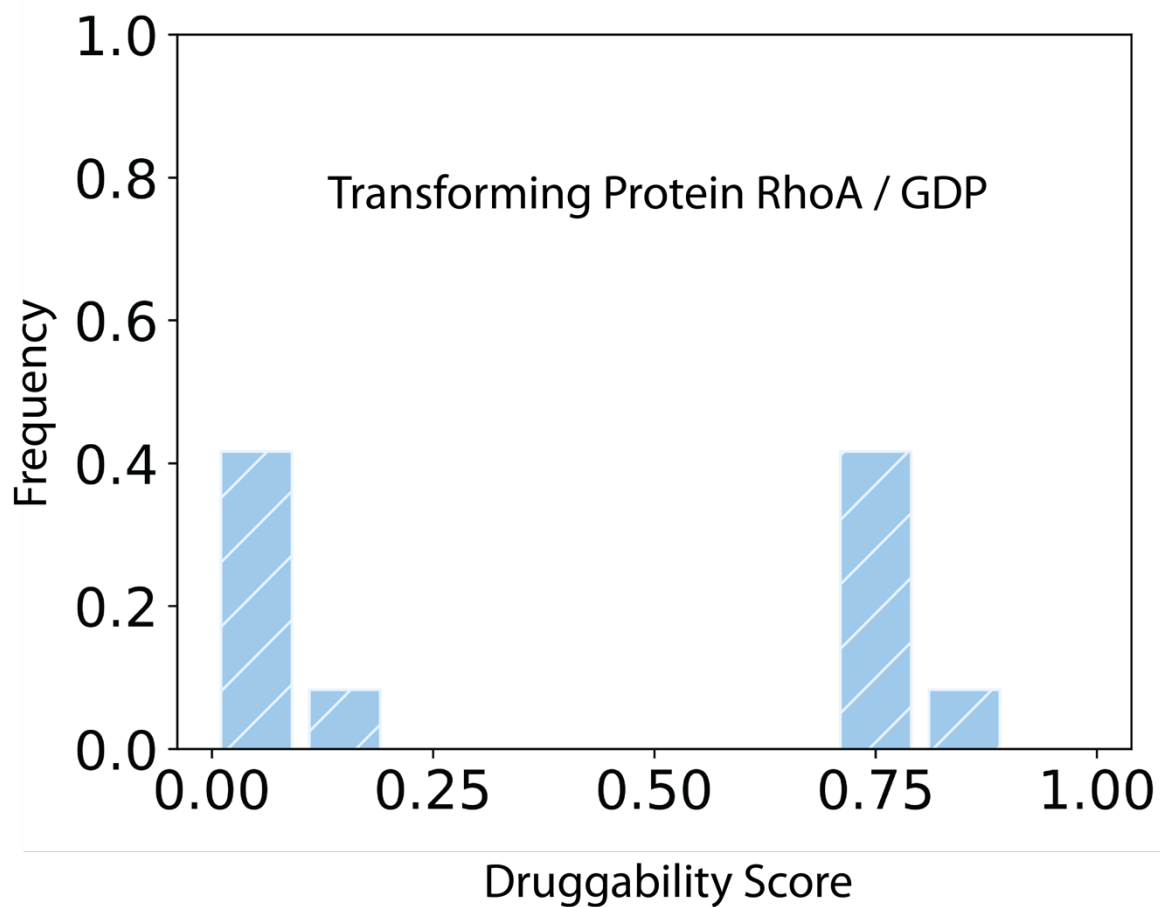

Figure S2. Druggability scores of unliganded Transforming Protein RhoA structures, related to Table 1 and Figure 5.

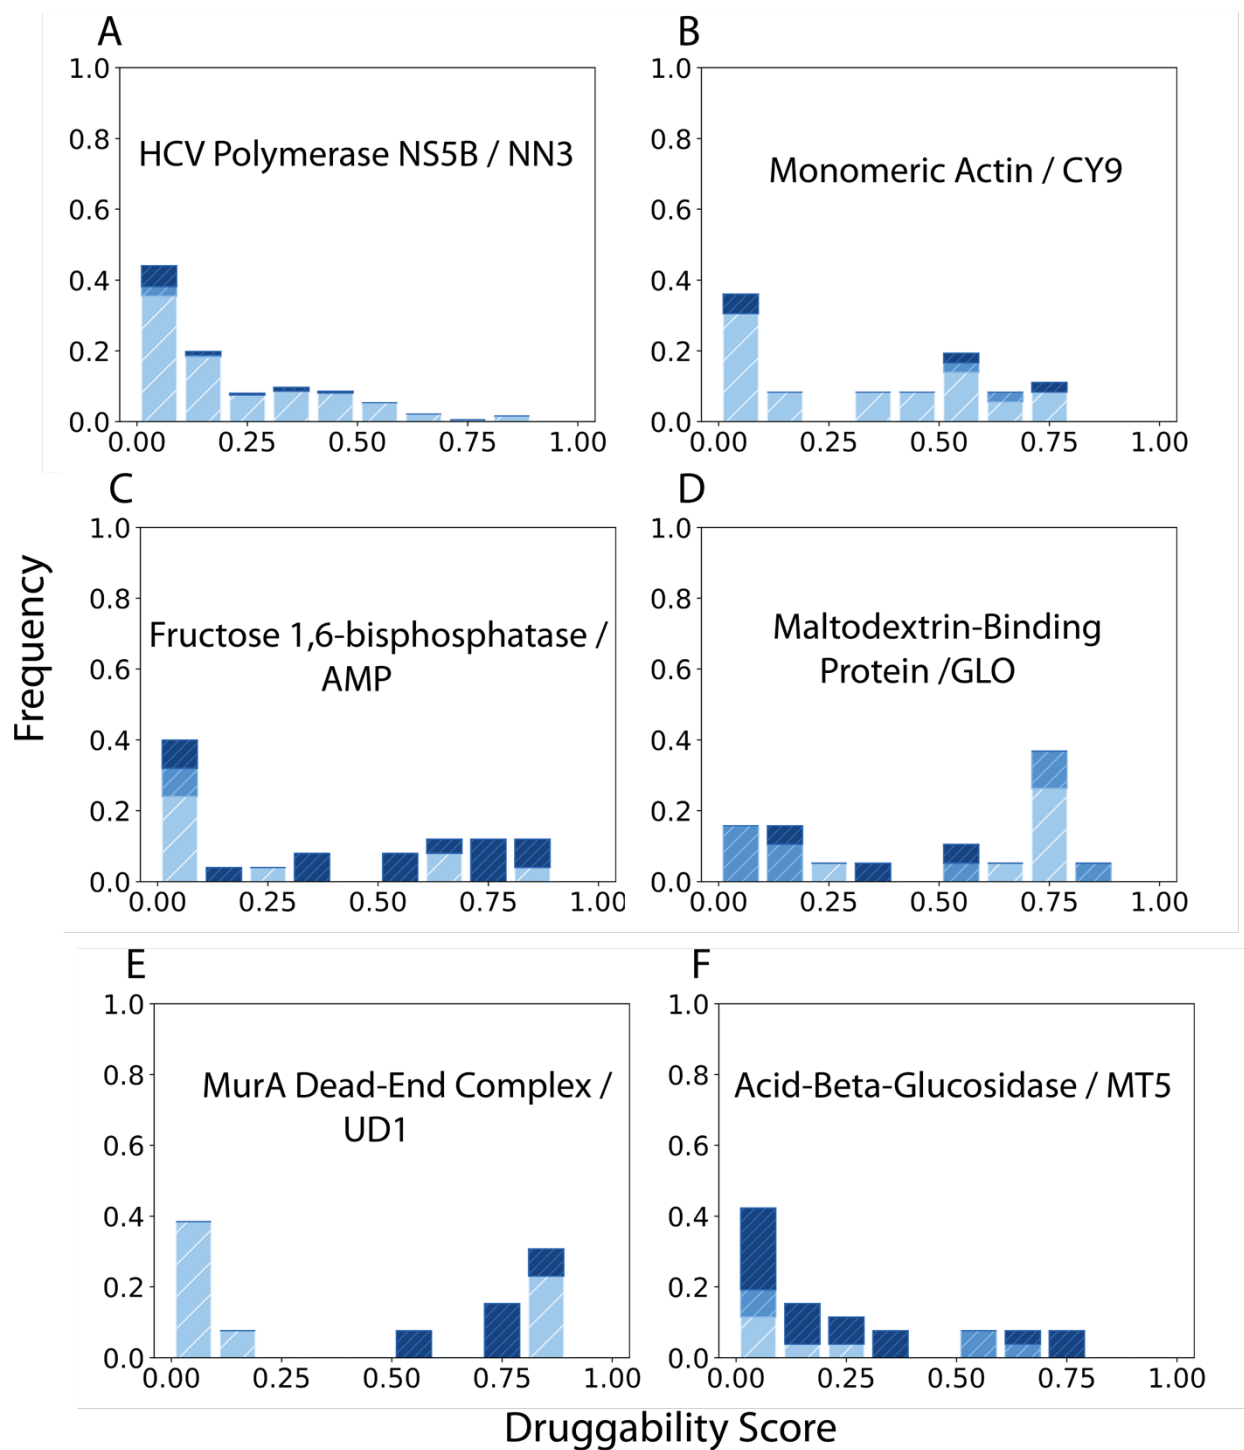

Figure S3. Druggability scores of additional structures, related to Figure 8.

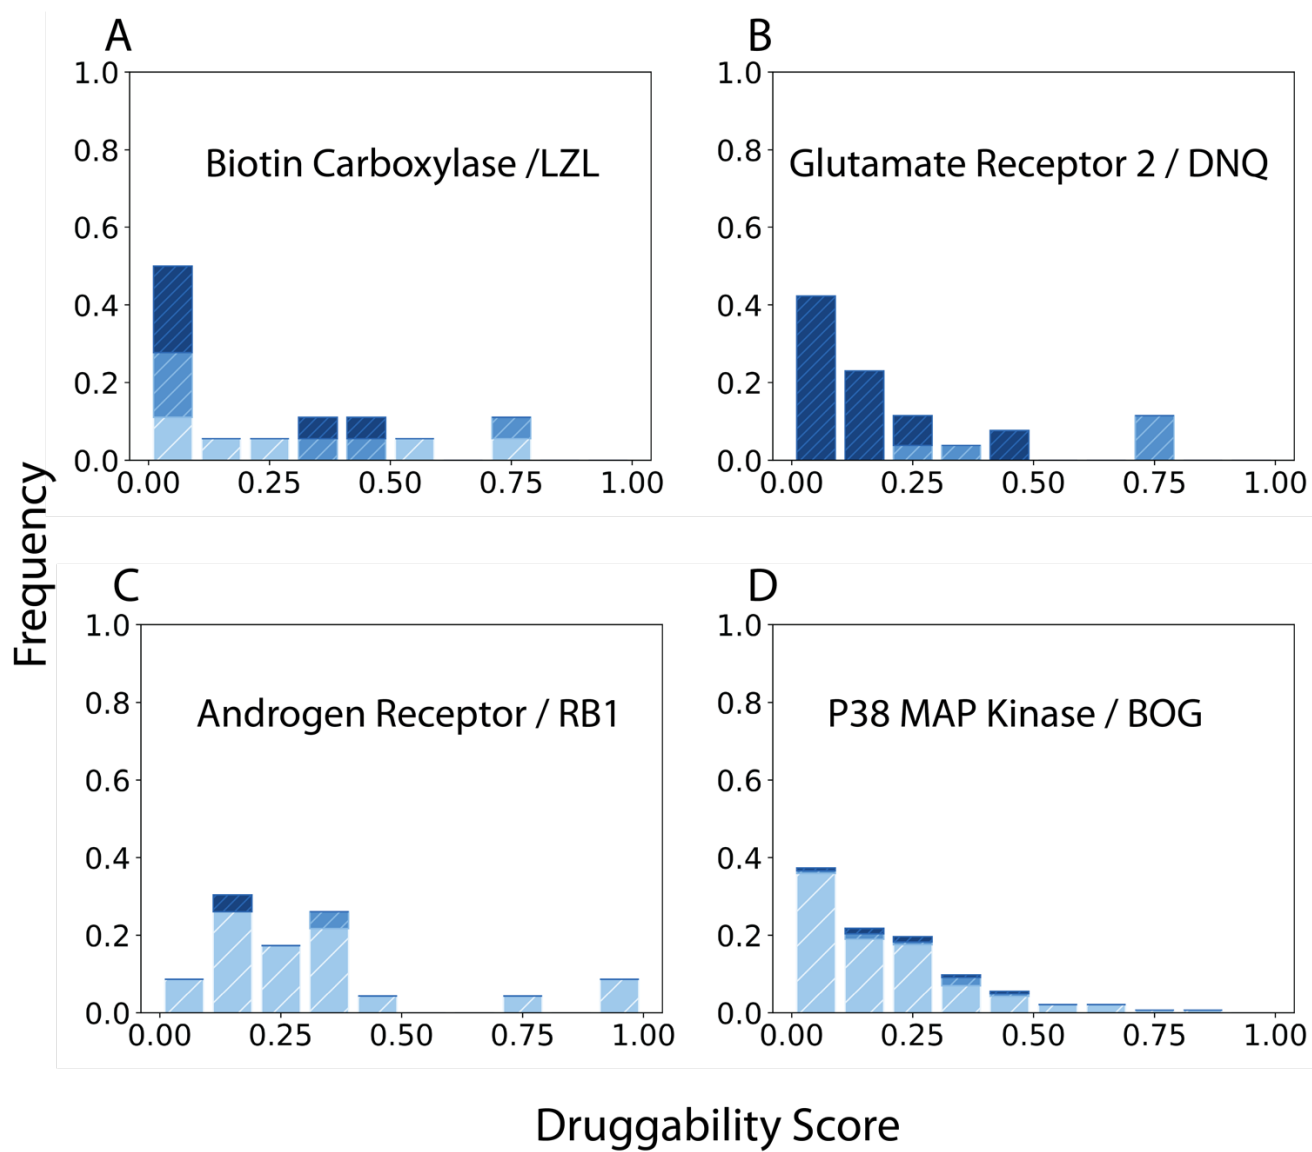

Figure S4. Druggability scores of more additional structures, related to Figure 8.

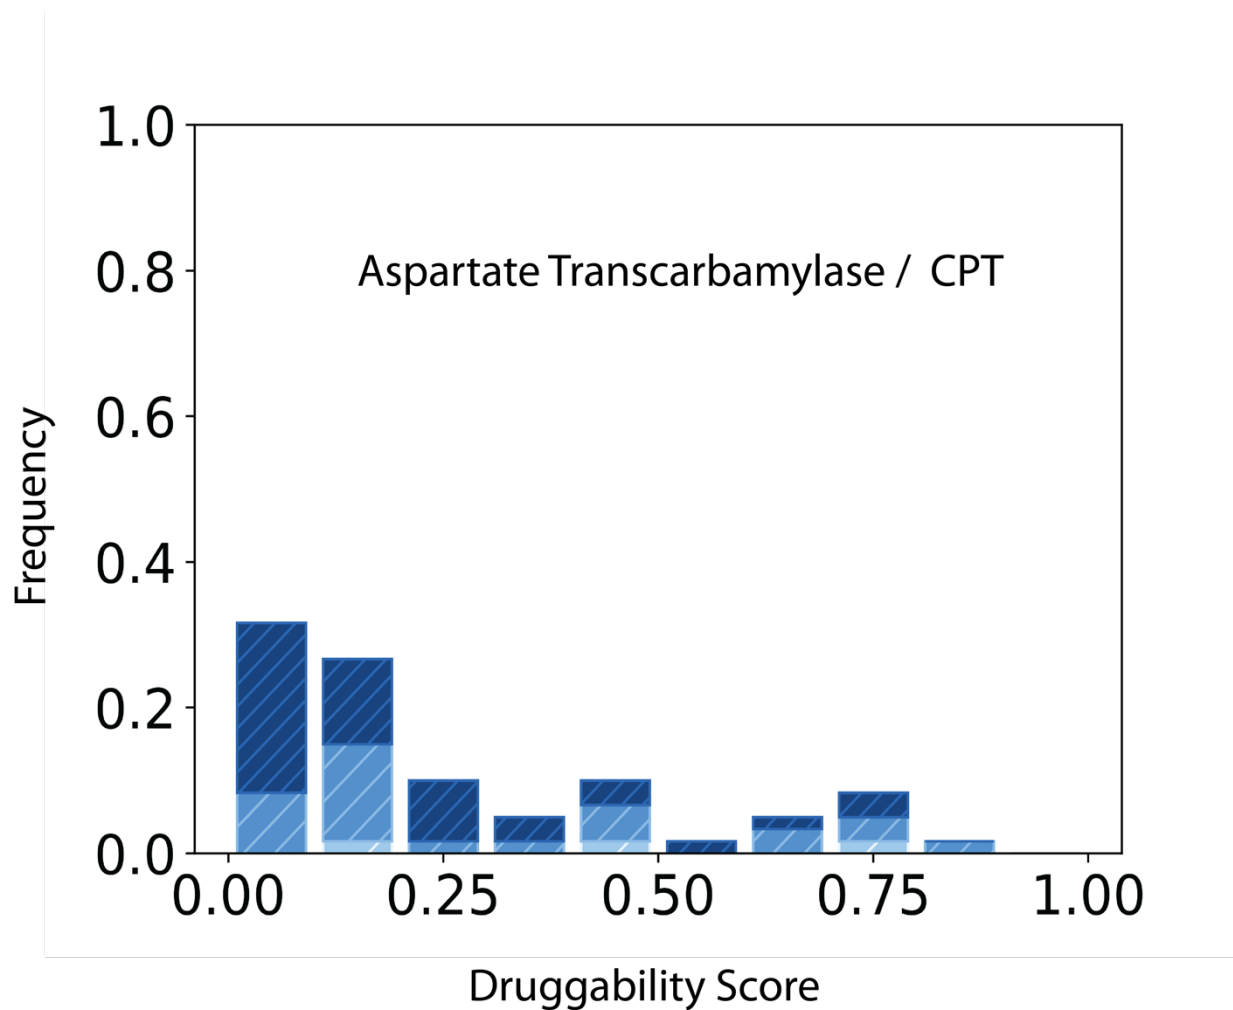

Figure S5. Druggability scores of unliganded Aspartate Transcarbamylase structures, related to Table 1 and Figure 8.
